# Supplementary material for: A Robotics-Based Behavioral Paradigm to Measure Anxiety-Related Responses in Zebrafish
Source: PubMed Central journal article supplement (PMC3726767; doi:10.1371/journal.pone.0069661), 2013-07-29

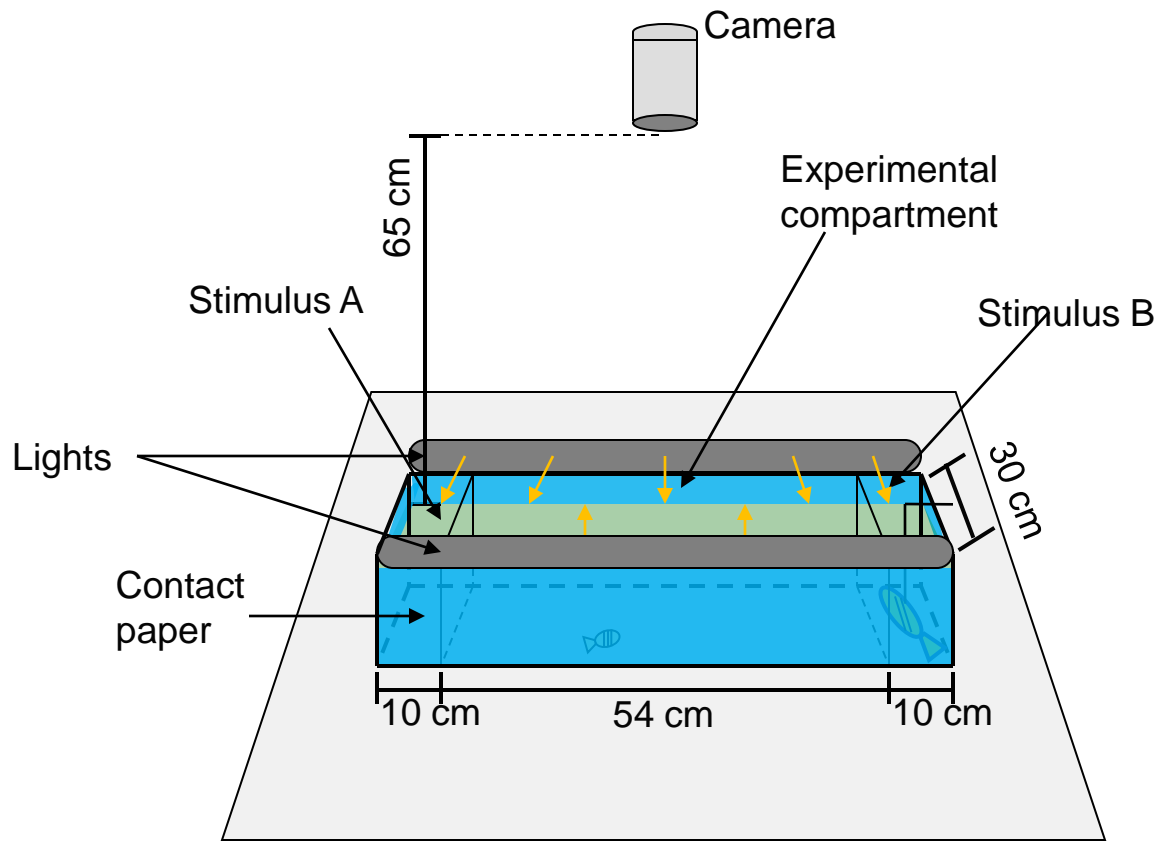

Supplement: pone.0069661.s002.pdf [file pone.0069661.s002.pdf]
